# Supplementary material
Source: PubMed Central journal article supplement (PMC5962022)
Supplement: NIHMS960462-supplement-Supplemental_File.pdf [file NIHMS960462-supplement-Supplemental_File.pdf]

Supplementary Materials for  
**Intercellular transmission of the unfolded protein response promotes survival and drug resistance in cancer cells**

Jeffrey J. Rodvold, Kevin T. Chiu, Nobuhiko Hiramatsu, Julia K. Nussbacher,  
Valentina Galimberti, Navin R. Mahadevan, Karl Willert,  
Jonathan H. Lin, Maurizio Zanetti\*

\*Corresponding author. Email: mzanetti@ucsd.edu

Published 6 June 2017, *Sci. Signal.* **10**, eaah7177 (2017)  
DOI: 10.1126/scisignal.aah7177

**This PDF file includes:**

- Fig. S1. TERS transmission and reception occur among various human cancer cell lines.
- Fig. S2. Nutrient-starved TERS-primed cells have increased viability during nutrient deprivation.
- Fig. S3. Bortezomib does not affect UPR transcription between vehicle- and TERS-primed cells but is less cytotoxic to TERS-primed cells.
- Fig. S4. TERS-primed LNCaP cells are protected from paclitaxel cytotoxicity.
- Fig. S5. TERS CM promotes abundance in  $\beta$ -catenin.
- Fig. S6. Validation of PC3.TOP reporter system.
- Fig. S7. MEF KO cells have selective sensitivity to TERS.
- Fig. S8. Population fitness of TERS-primed cells.
- Fig. S9. Histology analysis of TC1 vehicle- and TERS-primed tumors.

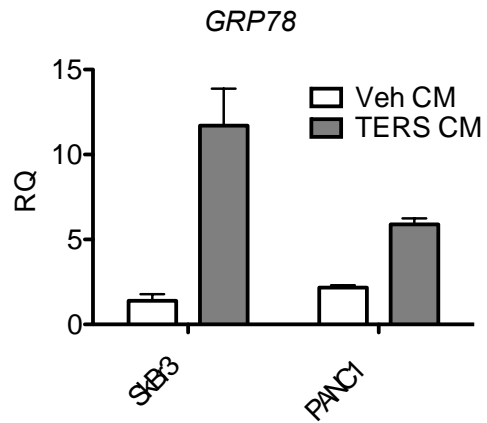

**Fig. S1. TERS transmission and reception occur among various human cancer cell lines.** (A) Expression of *GRP78* by RT-qPCR in human breast cancer cell line SkBr3 and human pancreatic cancer cell line PANC1 cultured in homologous vehicle- or TERS-conditioned medium (CM) for 24 hours. Expression was normalized to Veh CM SkBr3 cells. Data are means  $\pm$  SEM (n=2), representative of three independent experiments. RQ, relative quantification.

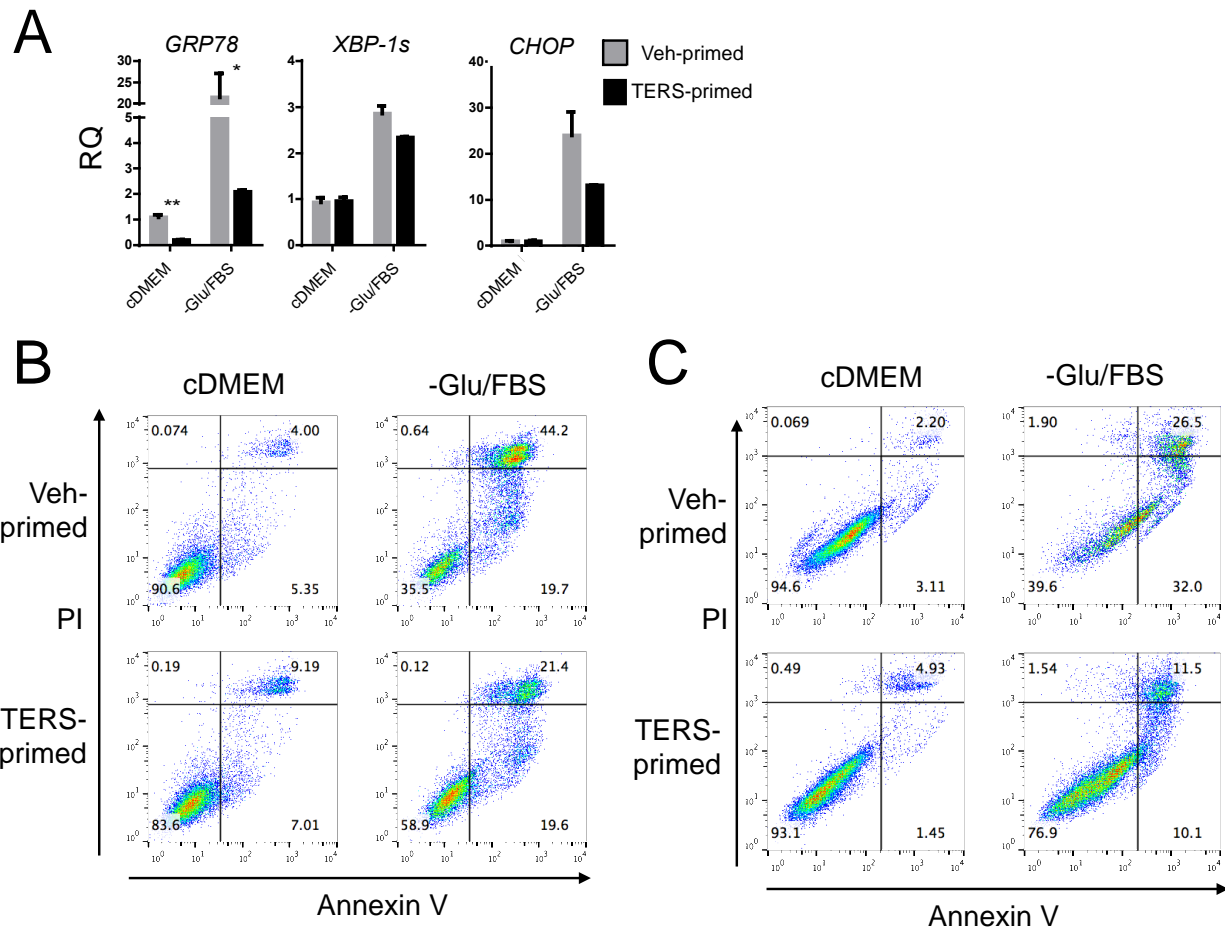

**Fig. S2. Nutrient-starved TERS-primed cells have increased viability during nutrient deprivation.** (A) Veh or TERS CM-primed PC3 cells were cultured in the presence (cDMEM) or absence of glucose and serum proteins (-Glu/FBS) for 48 hours and were analyzed by RT-qPCR for UPR status (*GRP78*, *XBP-1s*, *CHOP*). Gene expression was normalized to Veh-primed, cDMEM condition to determine relative quantification (RQ) of gene expression. Data are means  $\pm$  SEM (n=2 per condition). \*  $p < 0.05$ , \*\*  $p < 0.01$ , paired two-tailed Student's *t*-test. (B) Flow cytometry analysis for annexin V and propidium iodide (PI) staining in DU145 (B) or LNCaP (C) cells Veh-primed or TERS-primed and cultured in cDMEM or -Glu/FBS for 48 hours. Data are representative of two independent experiments.

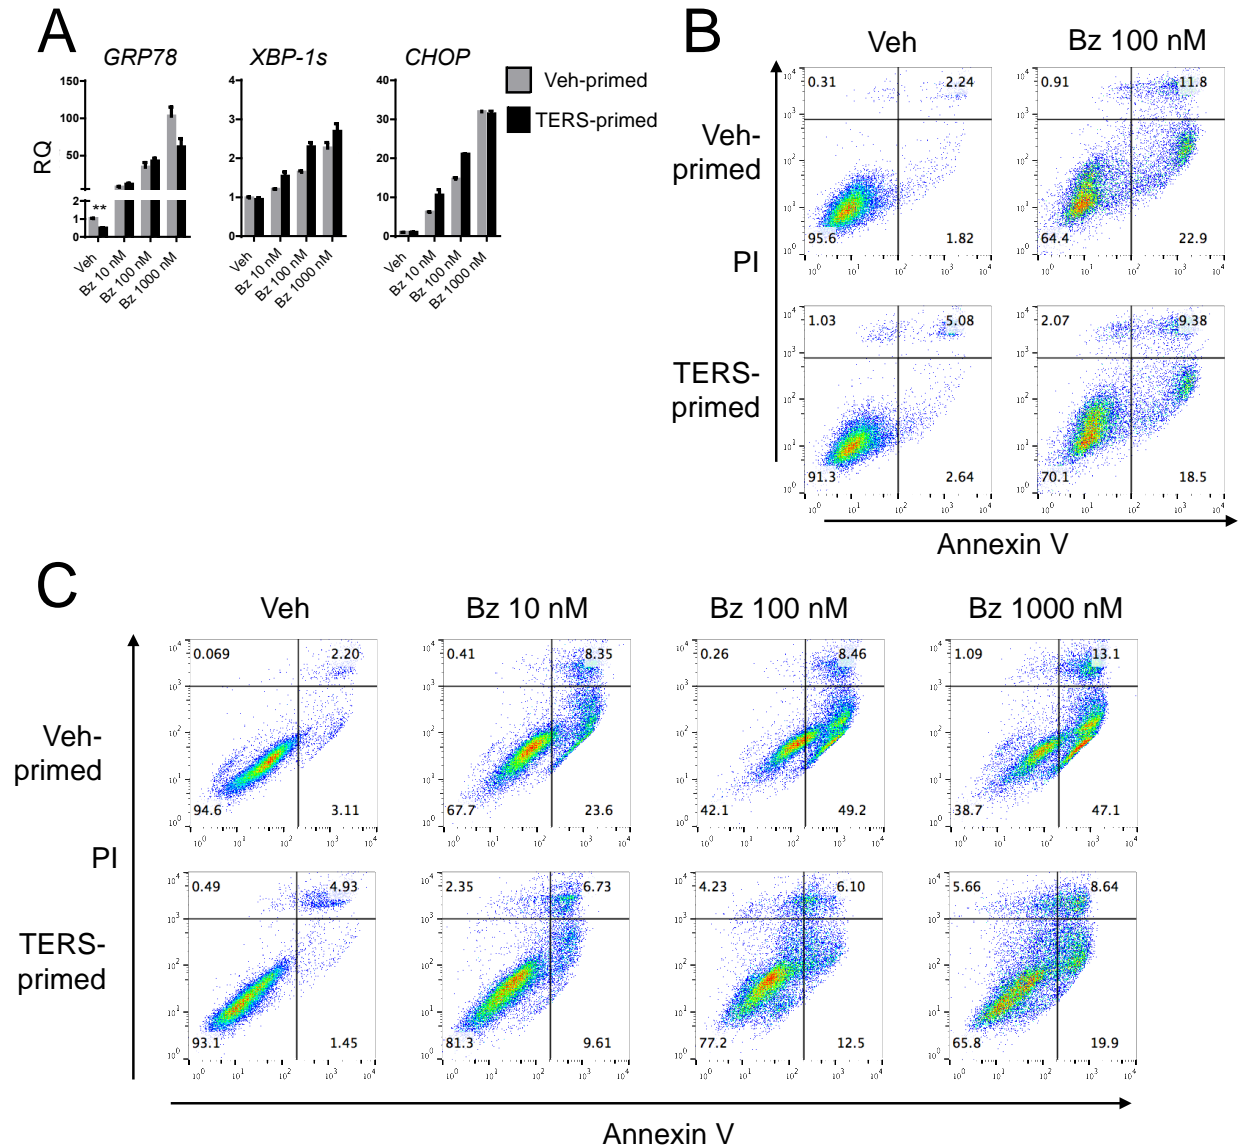

**Fig. S3. Bortezomib does not affect UPR transcription between vehicle- and TERS-primed cells but is less cytotoxic to TERS-primed cells.** (A) RT-qPCR analysis of *GRP78*, *XBP-1s*, and *CHOP* after 24 hours treatment with bortezomib or vehicle control (Veh) in vehicle- or TERS-primed PC3 cells. Relative quantification (RQ) was established by normalizing gene expression to Veh treated cells of Veh-primed PC3 cells. Data are means  $\pm$  SEM of three independent experiments (n=2 per condition).\*\*  $p < 0.01$ , paired two-tailed Student's *t*-test. (B and C) Flow cytometric analysis for annexin V and propidium iodide (PI) staining in DU145 (B) or LNCaP (C) cells Veh-primed or TERS-primed and cultured in bortezomib (Bz) or Veh control for 24 hours. Data are representative of two (B) and five independent experiments (C), respectively.

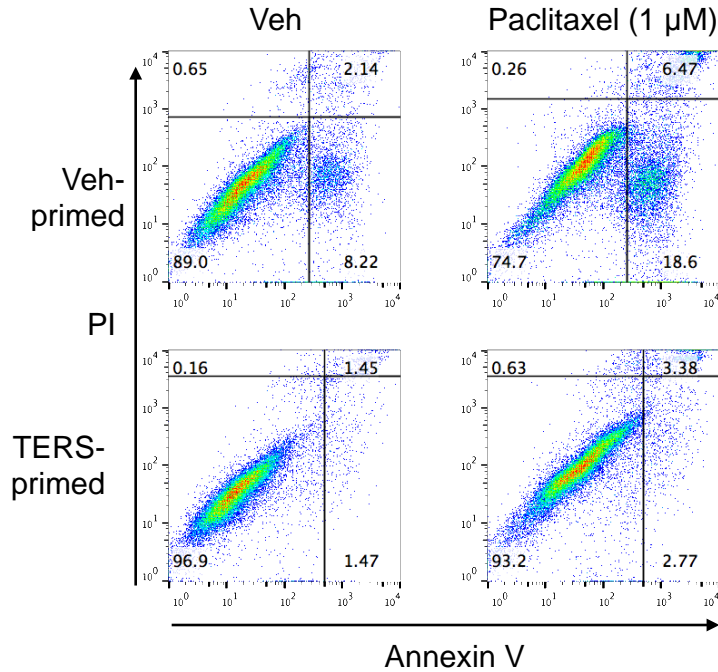

**Fig. S4. TERS-primed LNCaP cells are protected from paclitaxel cytotoxicity.** Flow cytometry analysis of annexin V and PI staining in vehicle- or TERS-primed LNCaP cells 24 hours after addition of paclitaxel compared to Veh control cultures. Data are representative of three independent experiments.

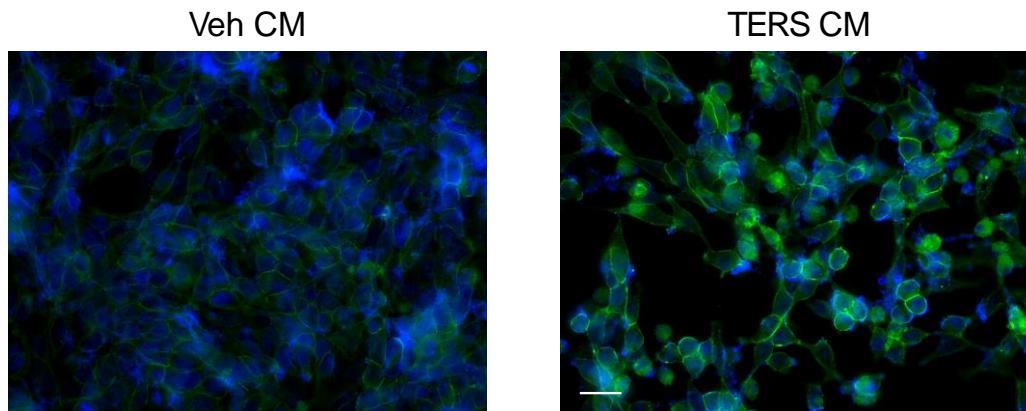

**Fig. S5. TERS CM promotes abundance in  $\beta$ -catenin.** Immunofluorescence staining for  $\beta$ -catenin (green) in LNCaP cells cultured in vehicle (Veh) CM or TERS CM for 48 hours. Nuclei are counterstained with DAPI (blue). Scale bars, 25  $\mu$ m. Microscopy images are representative of one field from three images of two independent experiments.

A

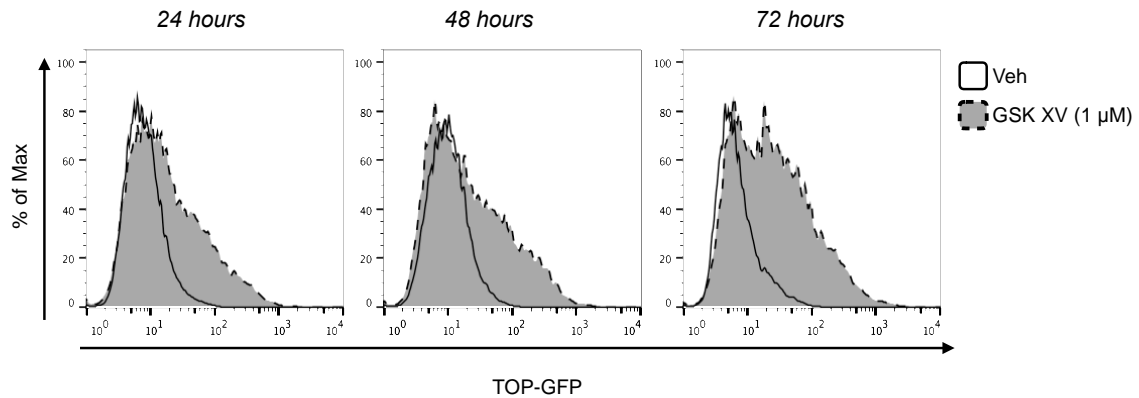

B

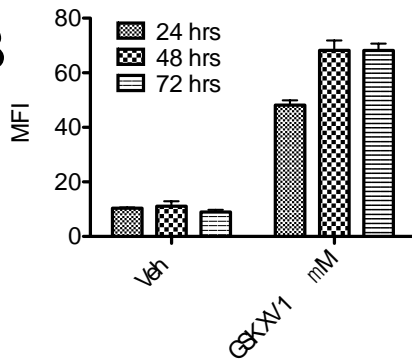

C

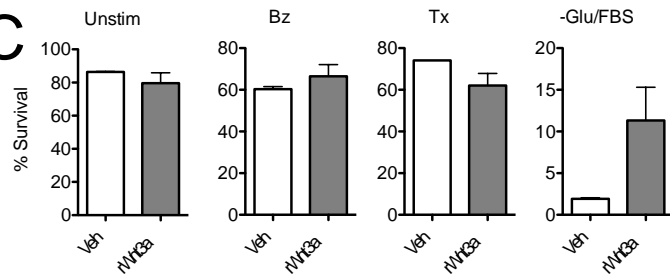

**Fig. S6. Validation of PC3.TOP reporter system.** (A and B) Flow cytometry analysis of PC3.TOP reporter cells treated with the GSK-3 inhibitor, GSK-XV, on days 1, 2, and 3. Representative histogram (A) and mean fluorescent intensity (MFI; B) ( $n=2$ ) of treated or Veh control cells. (C) 7AAD-based analysis of viability of LNCaP cells cultured with vehicle (Veh) or recombinant WNT3a (rWNT3a; 20 ng/ml for 2 days) and treated as indicated for an additional 48 hours. Bz, bortezomib (100 nM); Tx, paclitaxel (1  $\mu$ M); -Glu/FBS, nutrient-deprived medium. Viable cells were 7AAD-negative. Control cells were vehicle-treated (Veh). Data in (B and C) are  $MFI \pm SEM$  from 10,000 events per sample. Flow cytometry data are representative of three independent experiments.

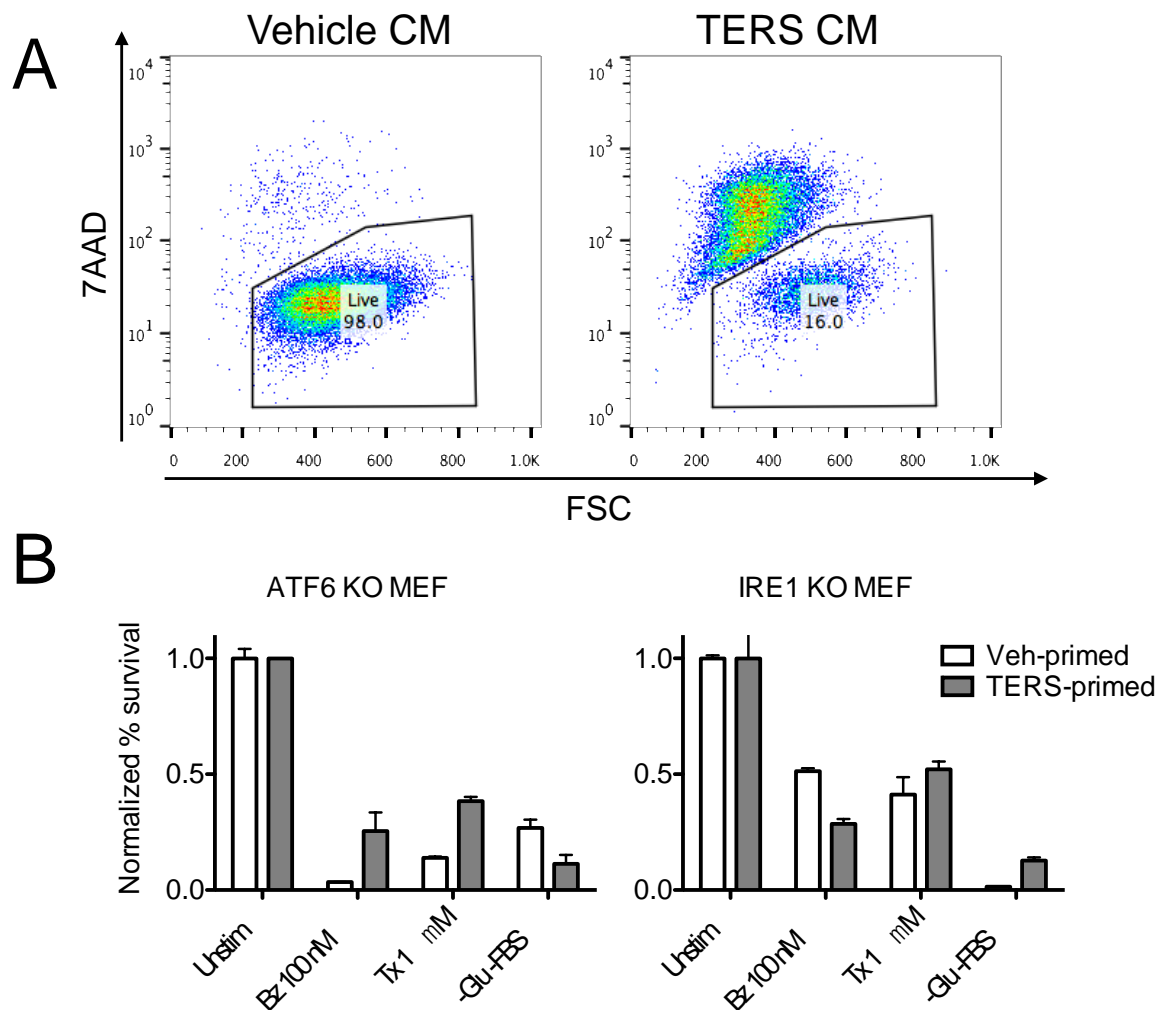

**Fig. S7. MEF KO cells have selective sensitivity to TERS.** (A) Flow cytometry analysis of viability of *PERK* KO MEFs cultured in TC1-derived Veh CM or TERS CM after two days of treatment as determined by 7AAD staining. Data were collected as 10,000 events/sample, and are representative of three independent experiments. FSC: forward scattered. (B) Flow cytometry analysis of 7AAD exclusion (viability) in *ATF6* and *IRE1* KO MEFs cultured in TC1 Veh or TERS CM and challenged for 48 hours as indicated. Bz, bortezomib; Tx, paclitaxel; -Glu/FBS, nutrient-deprived medium. Data were normalized to that of the corresponding untreated condition (unstim). Data are means  $\pm$  SEM (n=2) from three independent experiments.

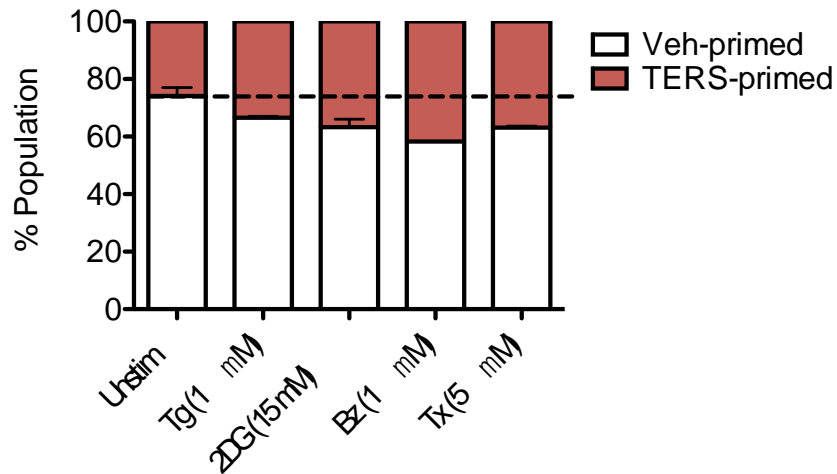

**Fig. S8. Population fitness of TERS-primed cells.** Percentage of TERS-primed TC1.RFP cells present in cocultures with Veh-primed TC1(untagged) cells after 24 hours treatment with thapsigargin (Tg), 2-deoxy glucose (2DG), bortezomib (Bz), or paclitaxel (Tx). Cell numbers were quantified by flow cytometry after exclusion of 7AAD-positive cells. Data are means  $\pm$  SEM (n=2; 10,000 events/sample) from representative of two independent experiments.

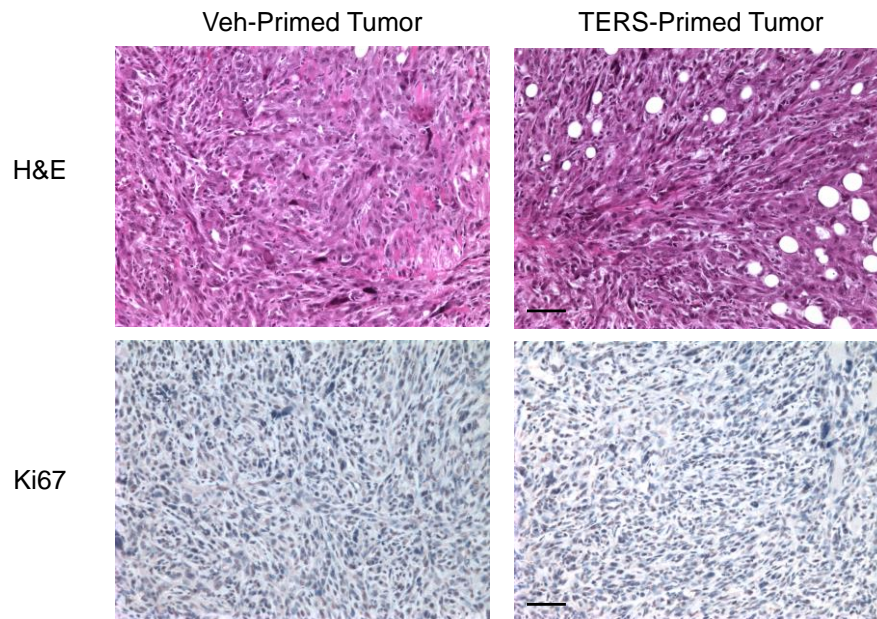

**Fig. S9. Histology analysis of TC1 vehicle- and TERS-primed tumors.** Haematoxylin and eosin (H&E) staining (for morphology; top) and Ki67 staining (for proliferation; bottom) in Veh-primed and TERS-primed TC1 tumors 30 days after implantation in C57BL/6 mice. Scale bar, 100  $\mu$ m. Images are representative of three fields from three individual tumors per group.
